# Supplementary material for: Characteristics and Electrochemical Performance of Hydroxyl-Functionalized Graphene Quantum Dot-Coated Si Nanoparticles/Reduced Graphene Hybrid Anodes for Advanced Li-Ion Batteries
Source: Hindawi journal article supplement (doi:10.1155/2023/6353894), 2023-05-18
Supplement: f1 [file 6353894.f1.docx]

**Supplementary materials**

**Characteristics and electrochemical performance of hydroxyl-functionalized graphene quantum dot–coated Si nanoparticles/reduced graphene hybrid anodes for advanced Li-ion batteries**

Angelica Martinoa, Ruye Conga, Minsang Job, Hyun-Ho Parka, Hochun Leeb,

Chang-Seop Leea,*

aDepartment of Chemistry, Keimyung University, Daegu 42601, Korea

bDepartment of Energy Science and Engineering, DGIST, Daegu 42988, Korea

*Corresponding author: Chang-Seop Lee

Department of Chemistry, Keimyung University, Daegu 42601, Korea

Phone No: +82-53-580-5192; Fax No: +82-53-580-5056

E-mail: surfkm@kmu.ac.kr


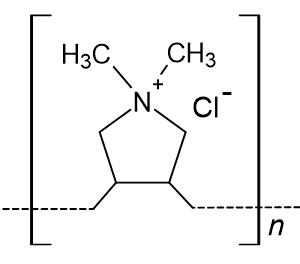


FIGURE S1. Structural formula of PDDA.


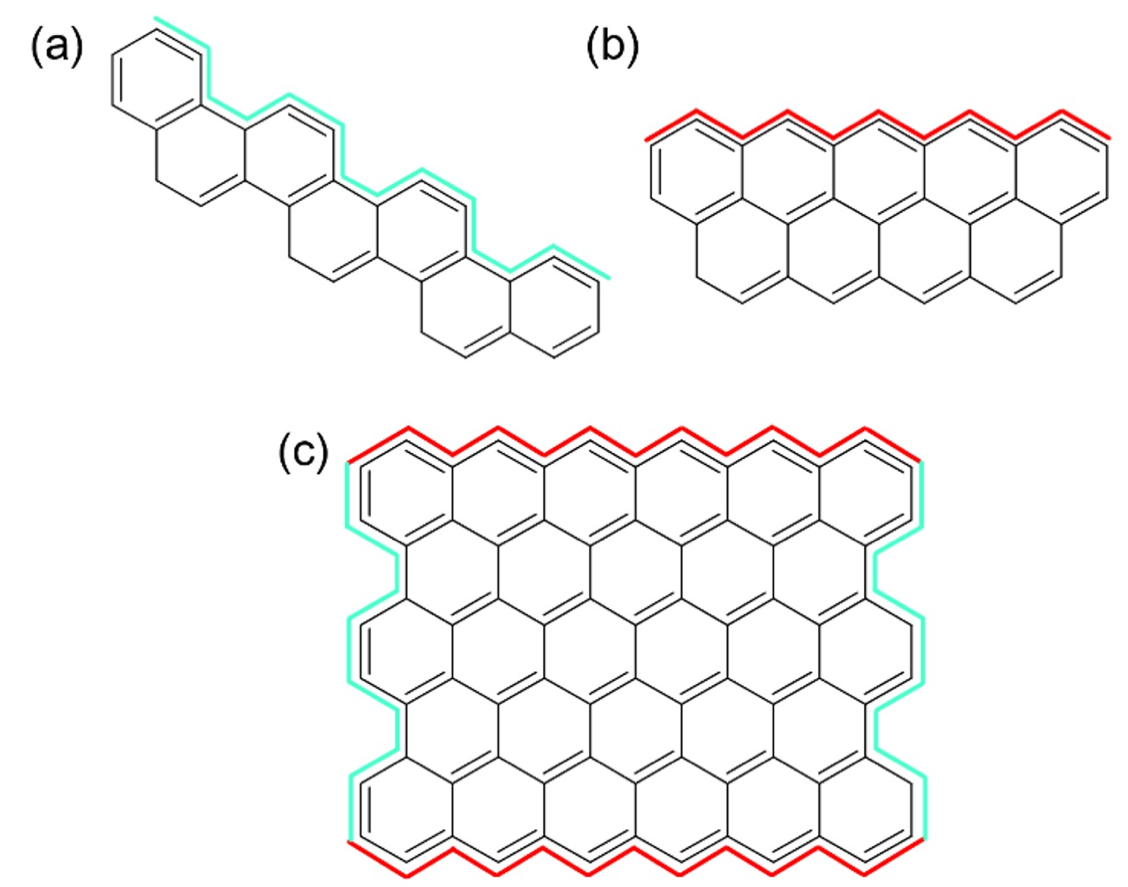


FIGURE S2. Typical edge conformational pattern of GQD: armchair (a), zigzag (b) and a combination of both (c).


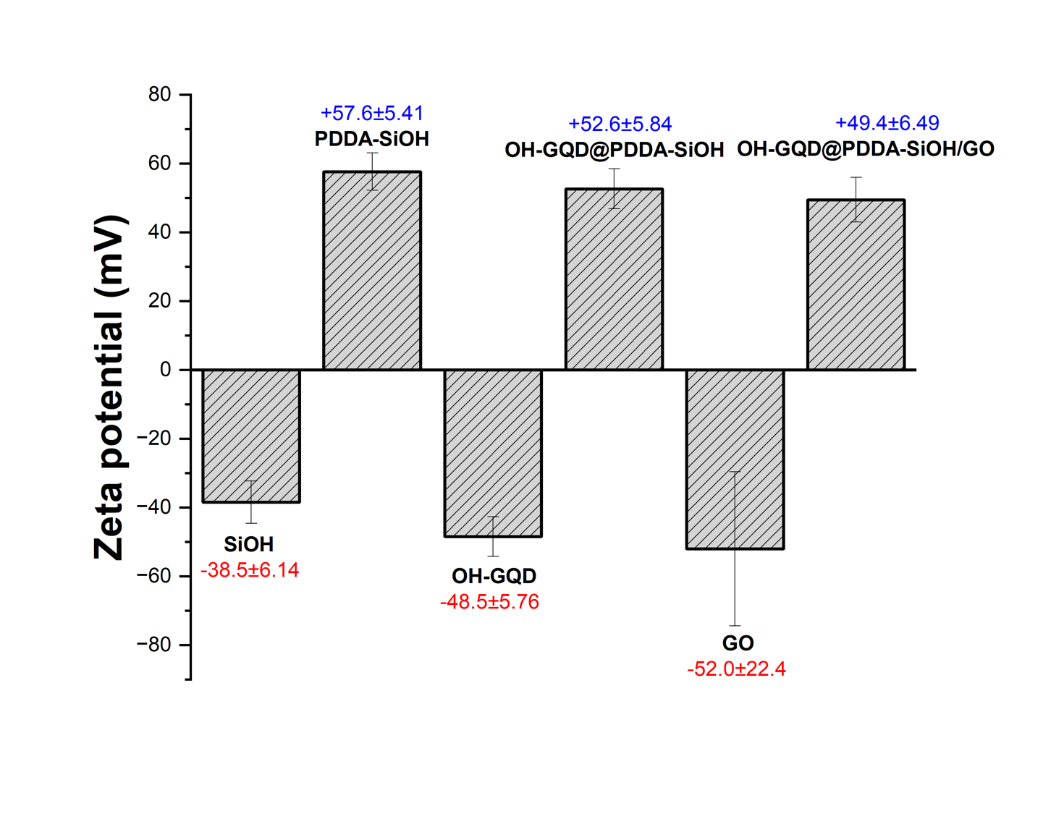


FIGURE S3. Zeta potential values of SiOH, PDDA@SiOH, OH-GQD, OH-GQD@PDDA@SiOH, GO, and OH-GQD@PDDA@SiOH/GO showing distinct opposing charges of particles.


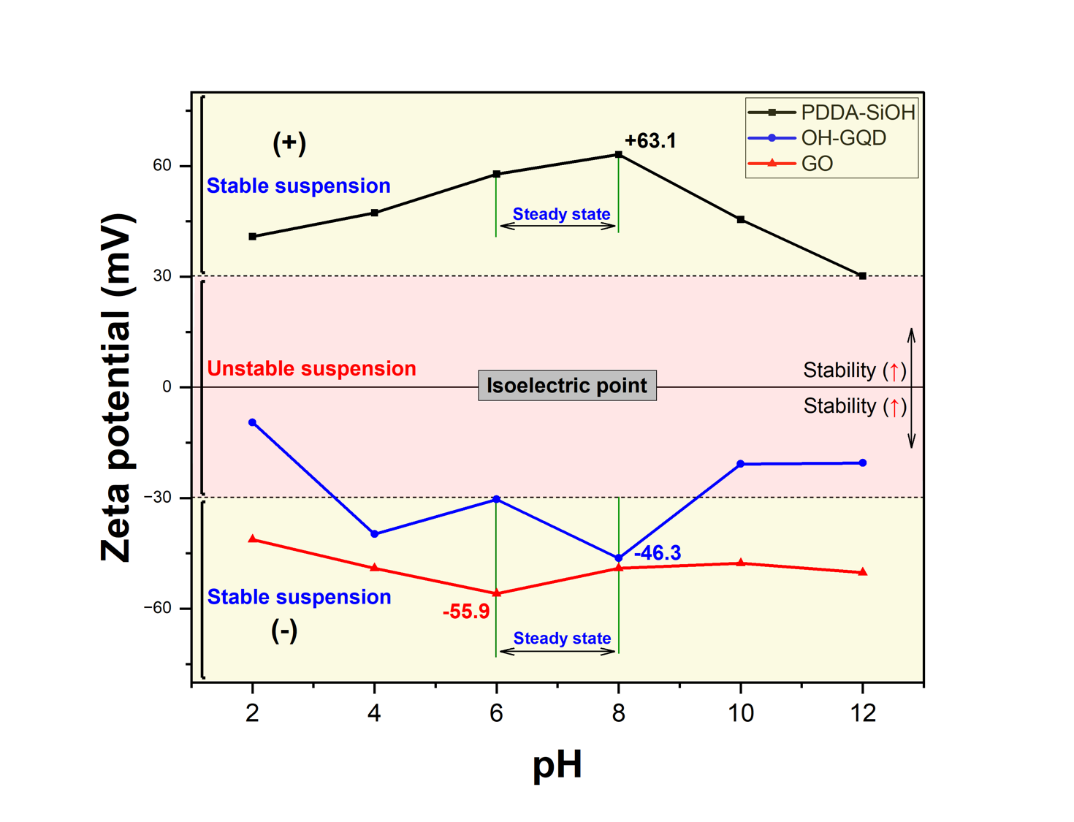


FIGURE S4. Zeta potential values of PDDA@SiOH, OH-GQD, and GO at different pH concentrations.


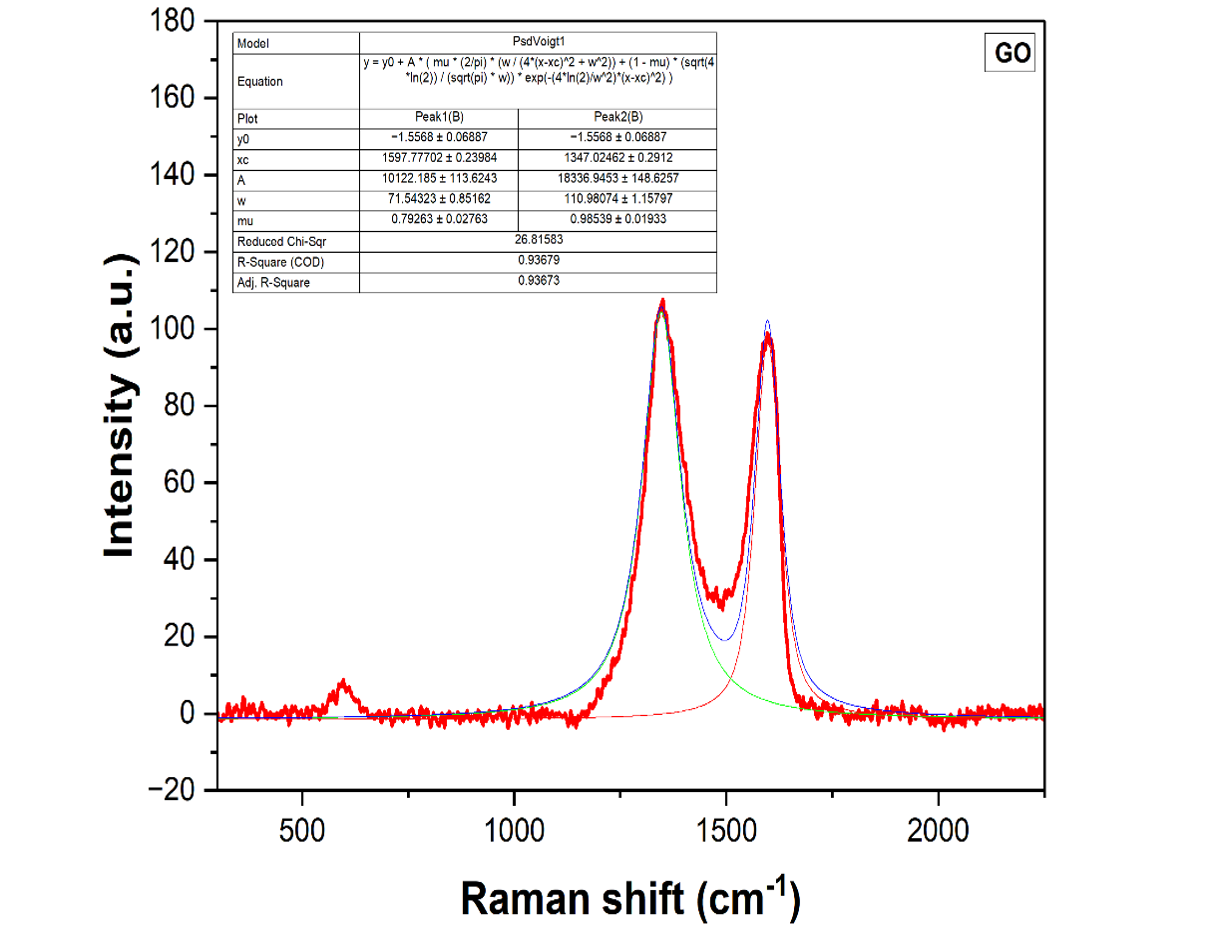


FIGURE S5. Raman peak fitting of GO.


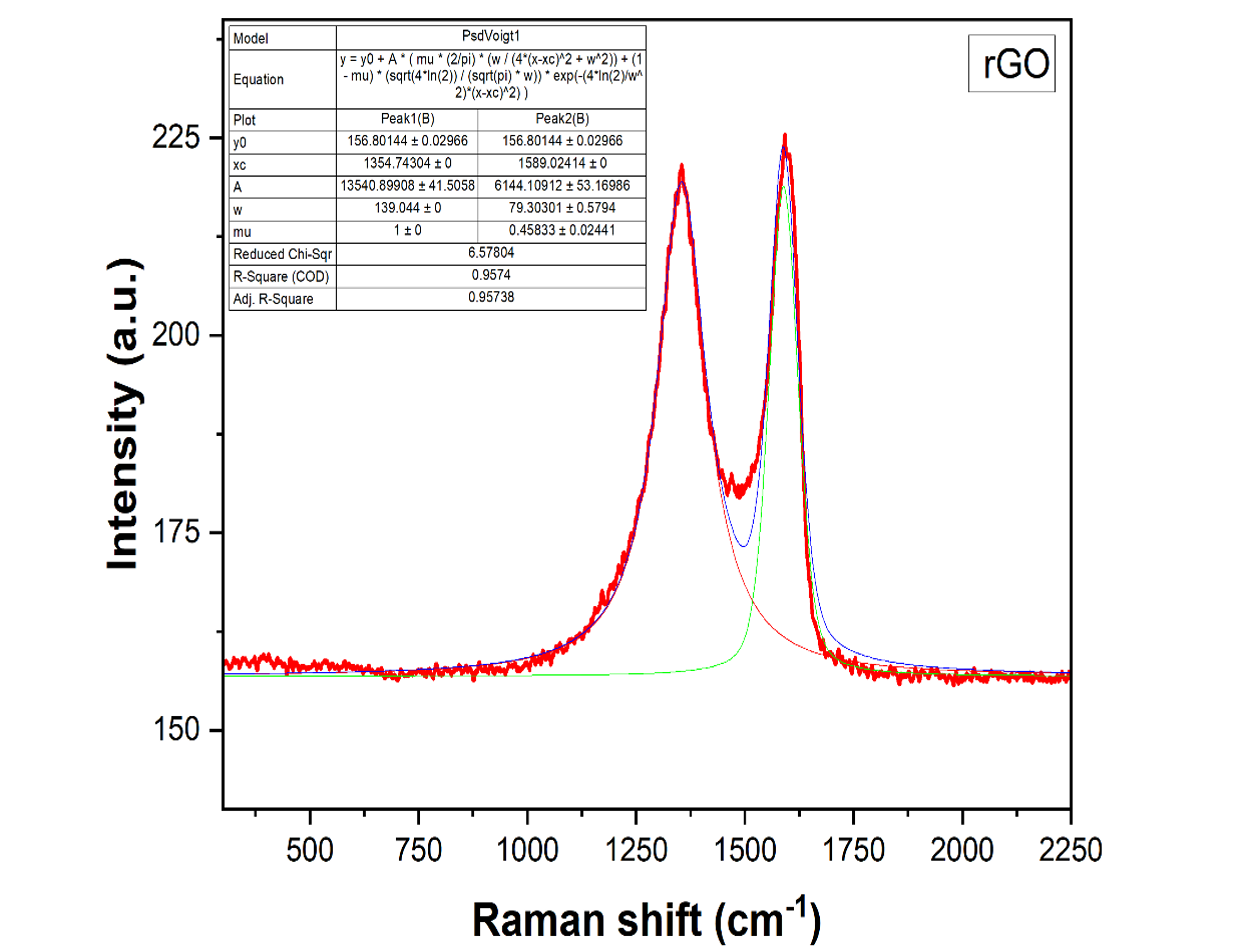


FIGURE S6. Raman peak fitting of rGO.


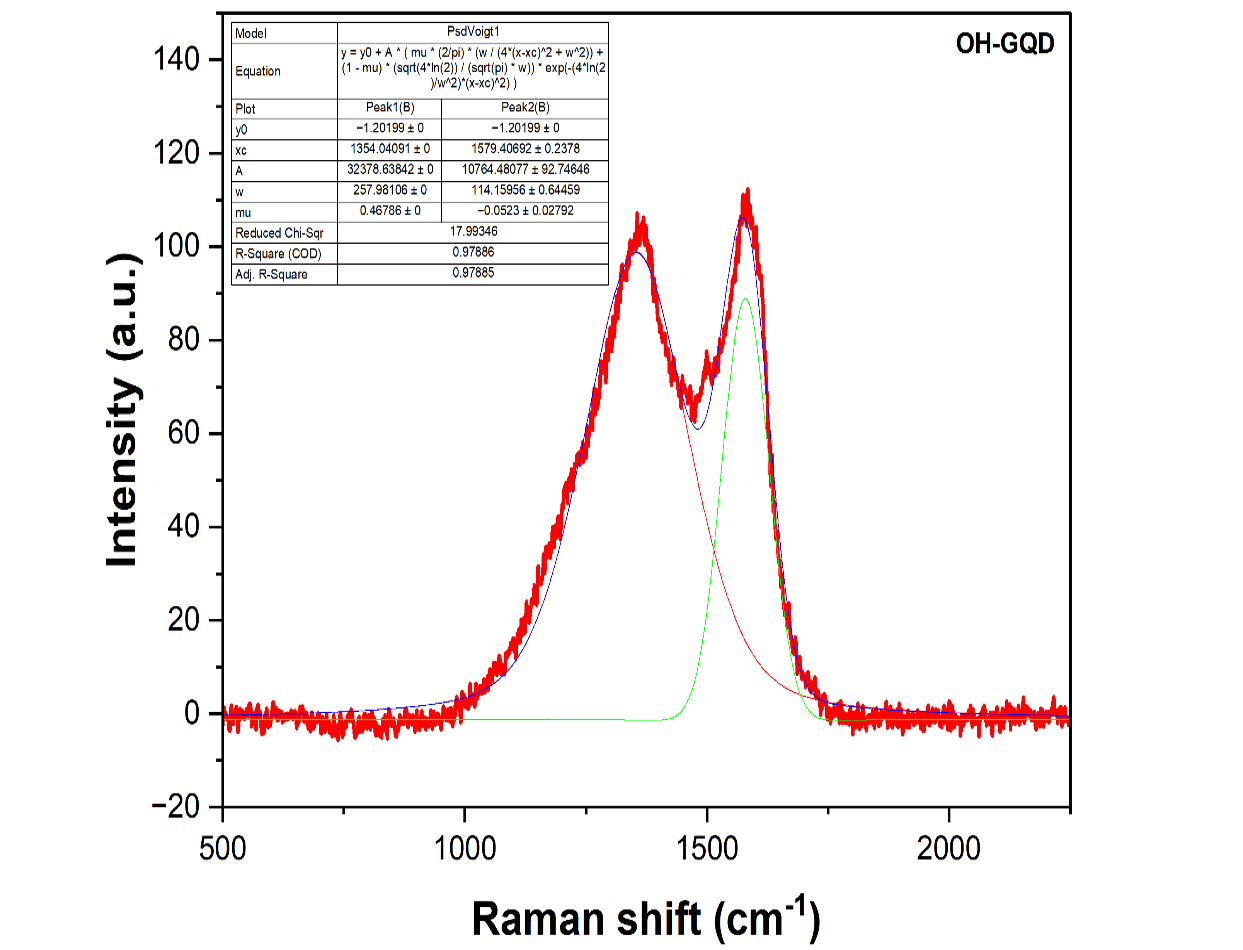


FIGURE S7. Raman peak fitting of OH-GQD.


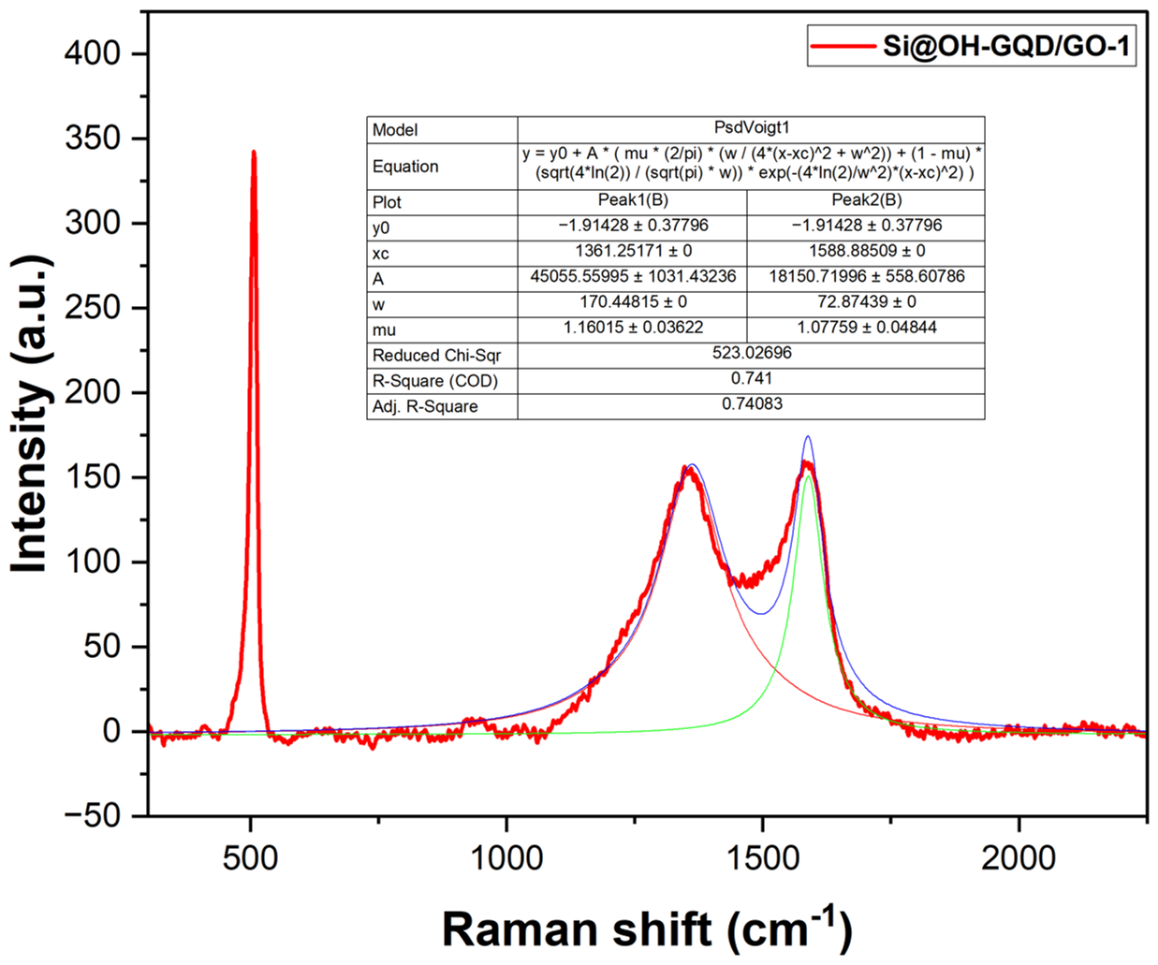


FIGURE S8. Raman peak fitting of OH-GQD@Si/GO-1.


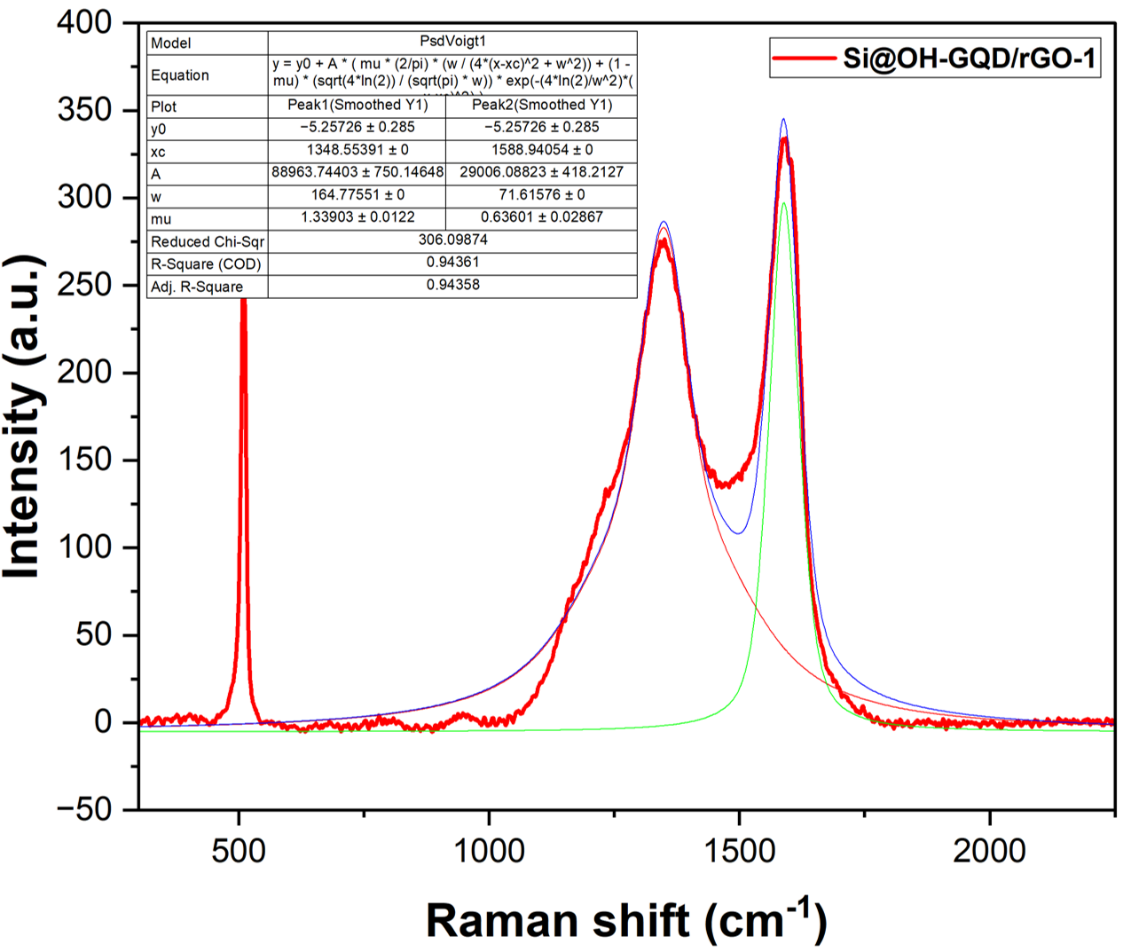


FIGURE S9. Raman peak fitting of OH-GQD@Si/rGO-1.


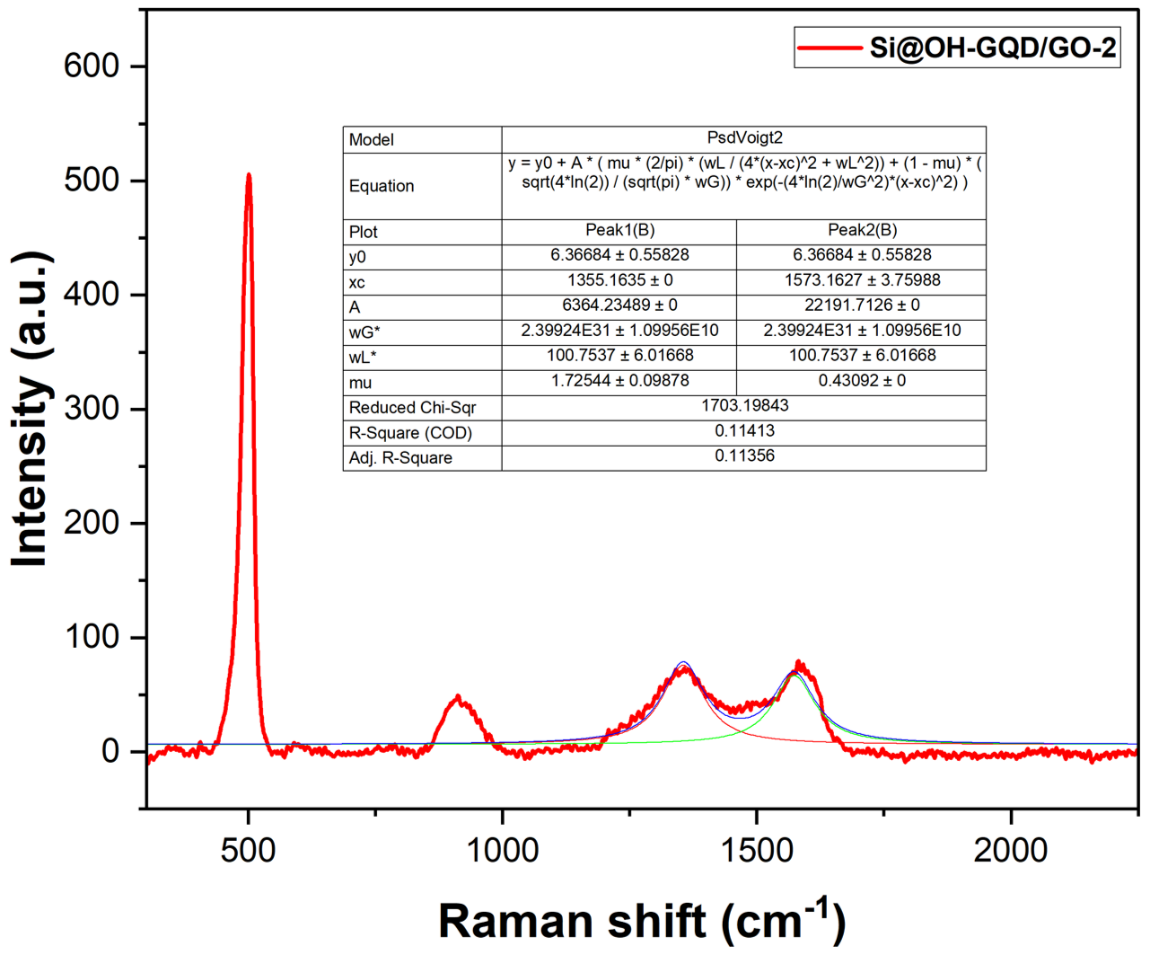


FIGURE S10. Raman peak fitting of OH-GQD@Si/GO-2


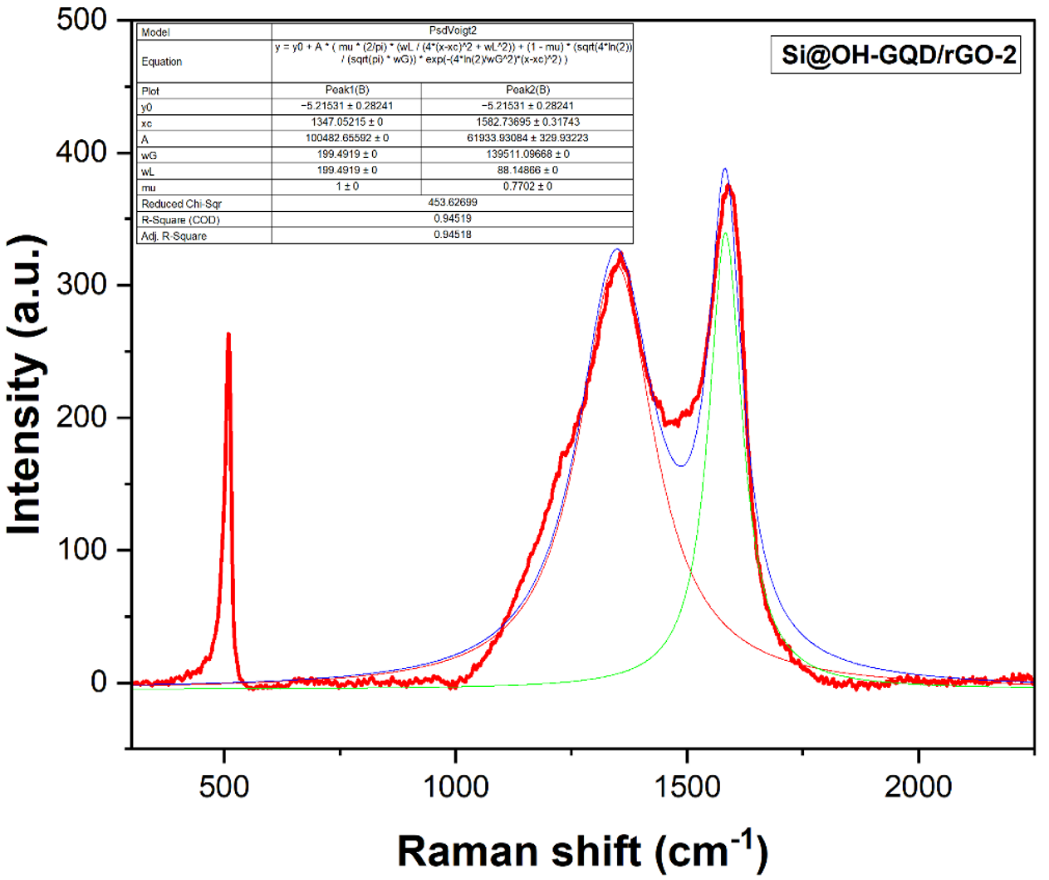


FIGURE S11. Raman peak fitting of OH-GQD@Si/rGO-2.


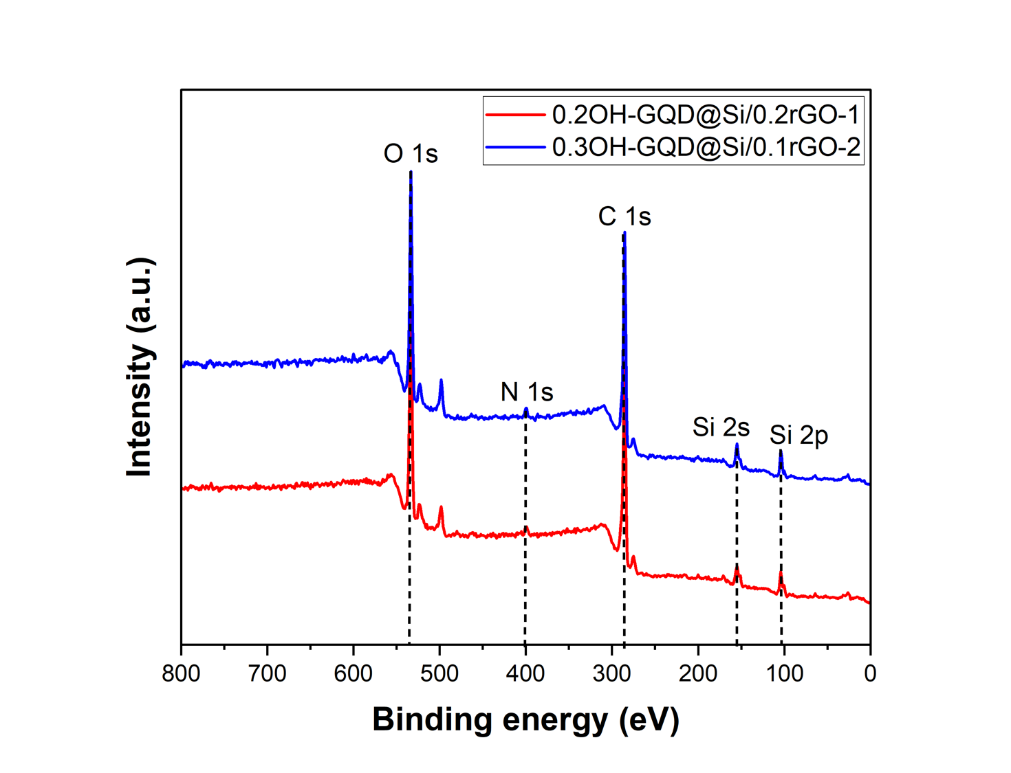


FIGURE S12. XPS survey spectra of the composites.


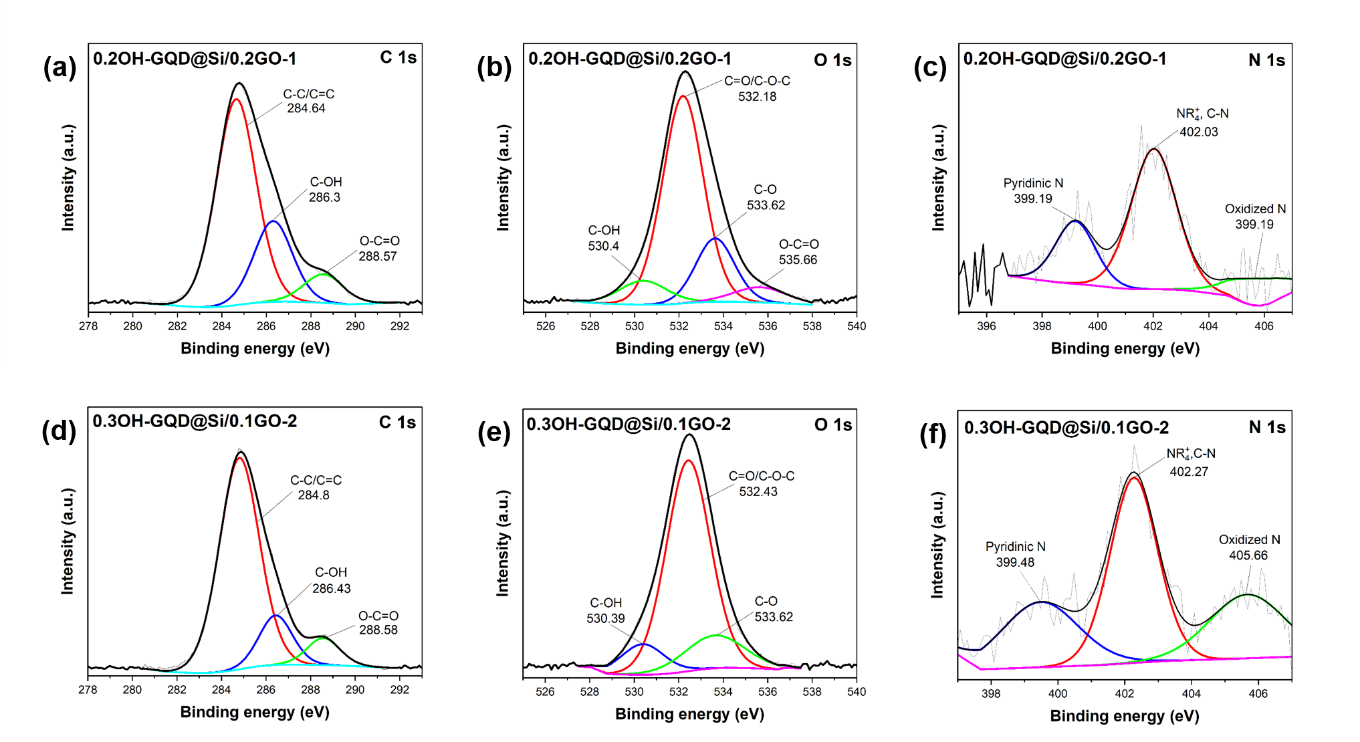


FIGURE S13. XPS High-resolution C 1s (a, d), O 1s (b, e) and N 1s (c, f) spectra of 0.2OH-GQD@Si/0.2GO-1 and 0.3OH-GQD@Si/0.1GO-2 composites, respectively.


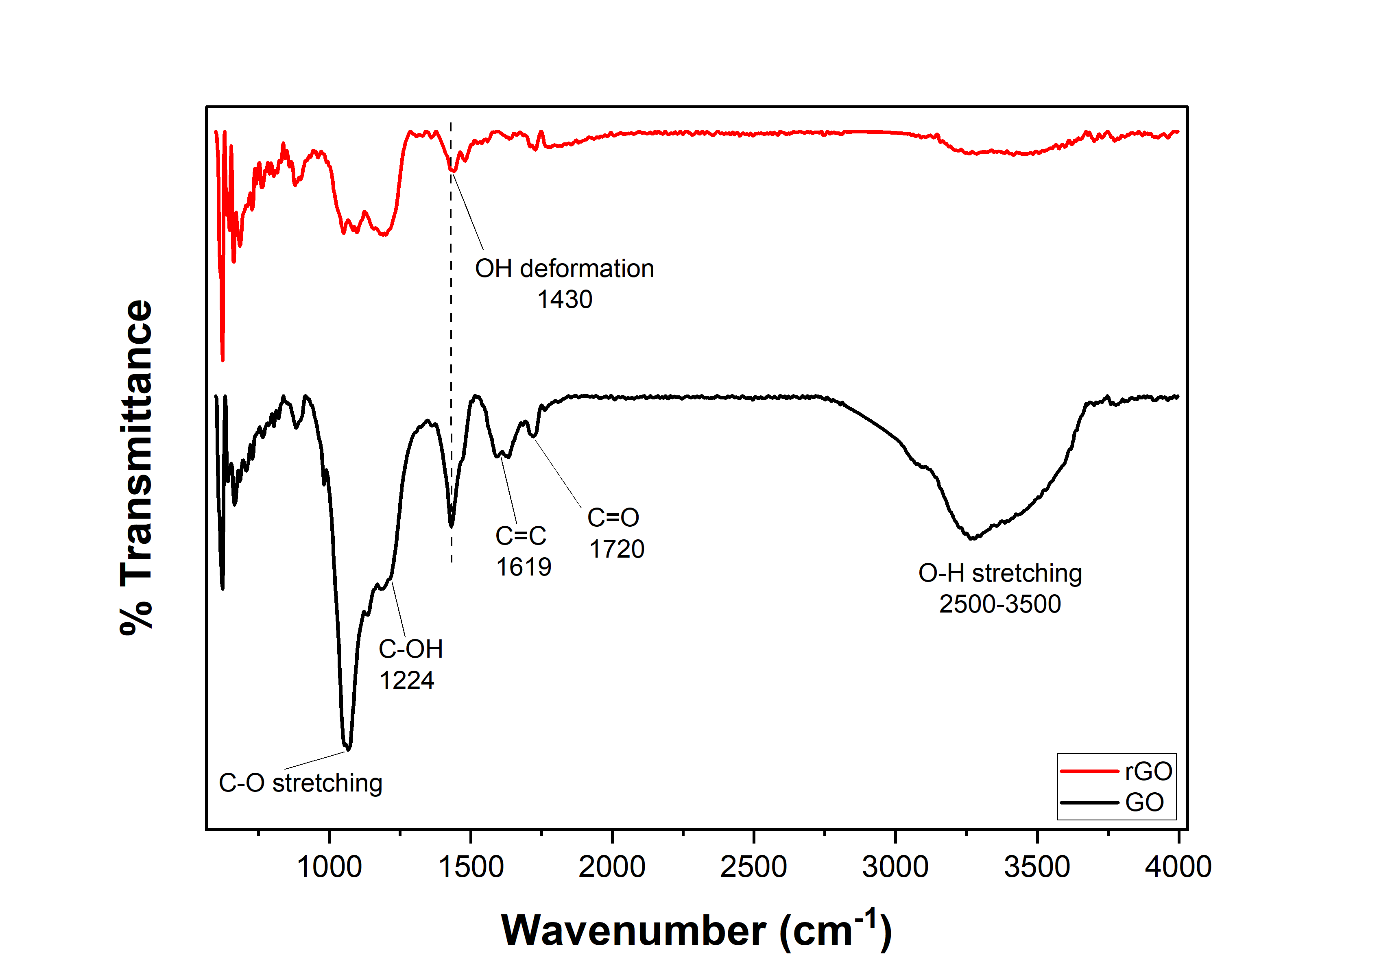


FIGURE S14. FT-IR showing the conversion of GO into rGO via thermal reduction.


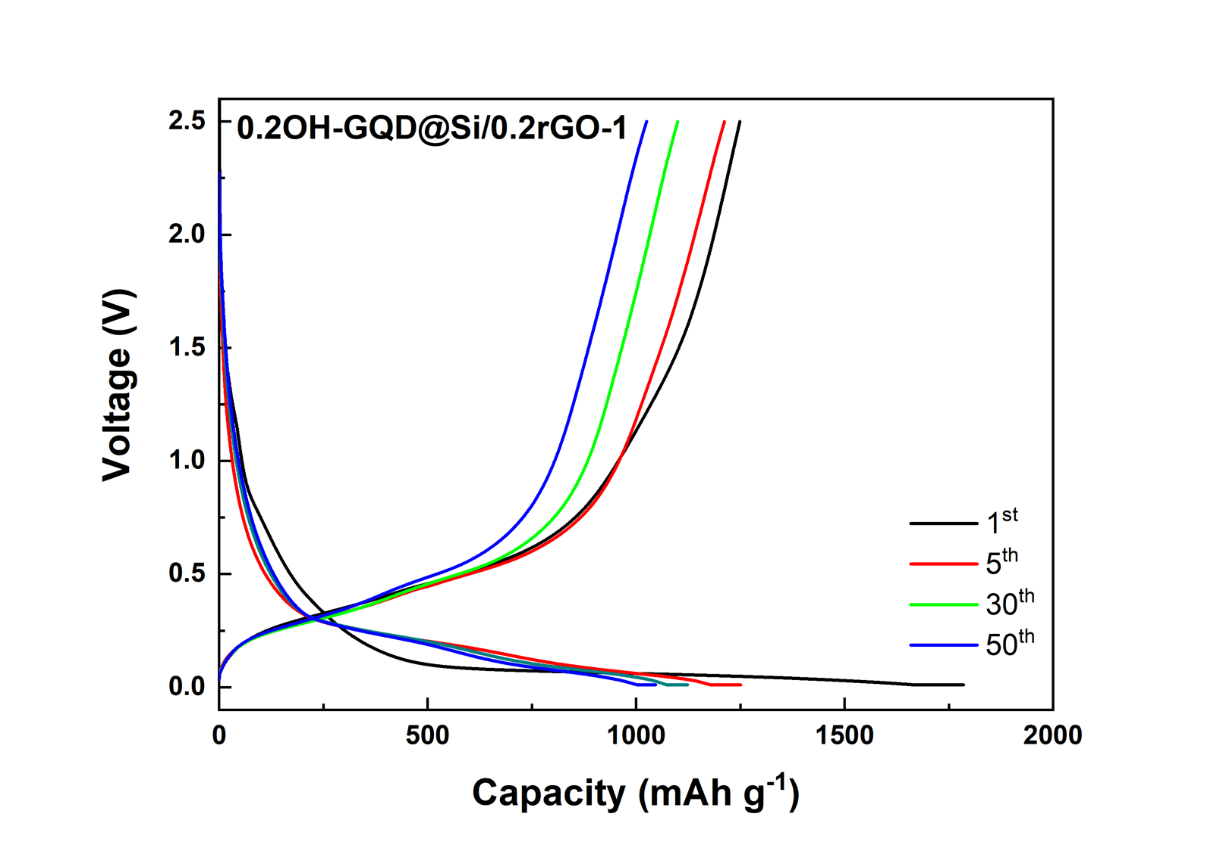


FIGURE S15. Galvanostic charge and discharge profiles of 0.2OH-GQD@Si/0.2rGO-1 composite at various cycles.


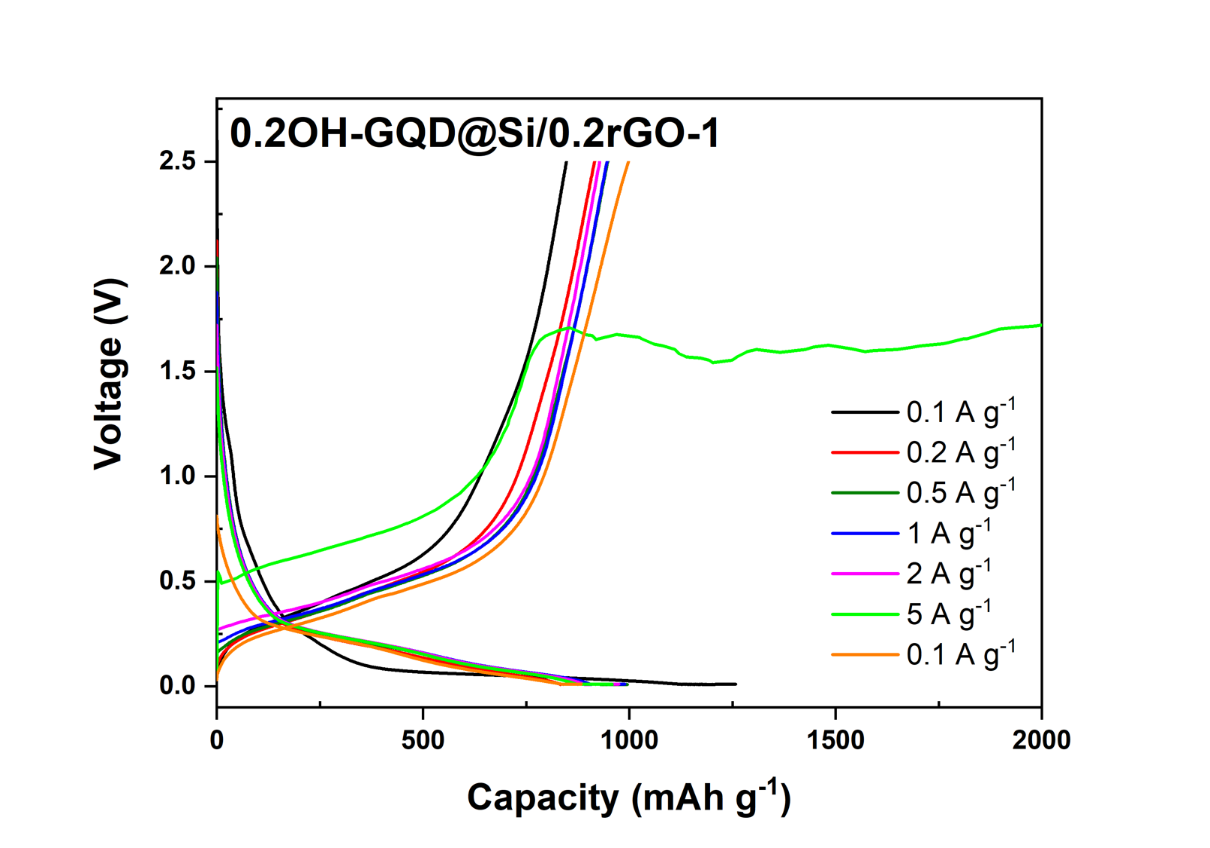


FIGURE S16. Galvanostic charge and discharge profiles of 0.2OH-GQD@Si/0.2rGO-1 composite at various current densities.


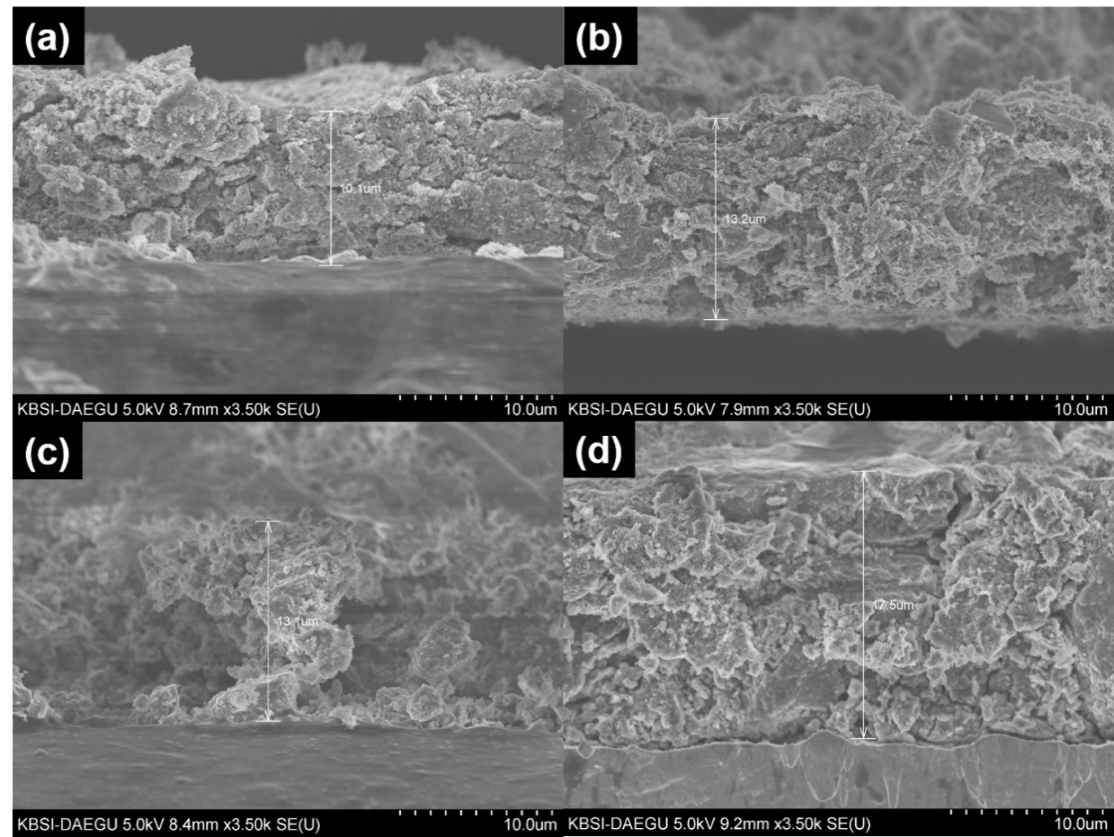


FIGURE S17. SEM images showing the cross-sectional view of the 0.2OH-GQD@Si/0.2rGO-1 and 0.3OH-GQD@Si/0.1rGO-2 electrodes before (a, b) and after 50 cycles (c, d), respectively.


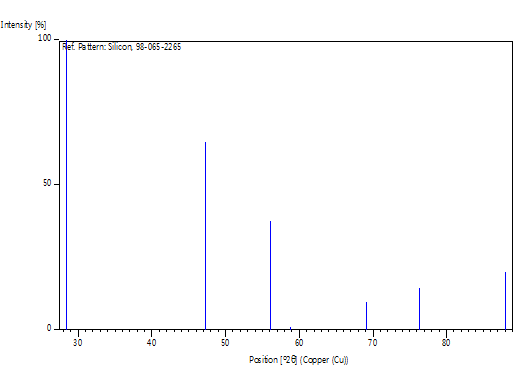


FIGURE S18. JCPDS Face-centered cubic Si crystal.

**Peak list**

| No. | h | k | l | d [Å] | 2Theta[deg] | I [%] |
| --- | --- | --- | --- | --- | --- | --- |
| 1 | 1 | 1 | 1 | 3.13559 | 28.442 | 100.0 |
| 2 | 0 | 2 | 2 | 1.92015 | 47.302 | 65.0 |
| 3 | 1 | 1 | 3 | 1.63751 | 56.122 | 37.8 |
| 4 | 2 | 2 | 2 | 1.56779 | 58.856 | 0.0 |
| 5 | 0 | 0 | 4 | 1.35775 | 69.129 | 9.8 |
| 6 | 1 | 3 | 3 | 1.24596 | 76.375 | 14.4 |
| 7 | 2 | 2 | 4 | 1.10860 | 88.029 | 19.9 |


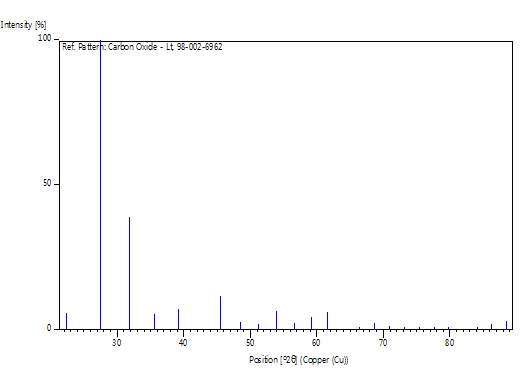


FIGURE S19.Cubic carbon oxide crystal (Reference code 98-002-6962)

**Peak list**

| No. | h | k | l | d [Å] | 2Theta[deg] | I [%] |
| --- | --- | --- | --- | --- | --- | --- |
| 1 | 0 | 1 | 1 | 3.98101 | 22.313 | 5.9 |
| 2 | 1 | 1 | 1 | 3.25048 | 27.417 | 100.0 |
| 3 | 0 | 0 | 2 | 2.81500 | 31.762 | 38.8 |
| 4 | 0 | 1 | 2 | 2.51781 | 35.629 | 5.3 |
| 5 | 1 | 1 | 2 | 2.29844 | 39.162 | 7.2 |
| 6 | 0 | 2 | 2 | 1.99051 | 45.534 | 11.7 |
| 7 | 1 | 2 | 2 | 1.87667 | 48.468 | 2.6 |
| 8 | 0 | 1 | 3 | 1.78036 | 51.274 | 1.8 |
| 9 | 1 | 1 | 3 | 1.69751 | 53.973 | 6.4 |
| 10 | 2 | 2 | 2 | 1.62524 | 56.583 | 2.3 |
| 11 | 0 | 3 | 2 | 1.56148 | 59.117 | 4.3 |
| 12 | 1 | 2 | 3 | 1.50468 | 61.586 | 6.2 |
| 13 | 0 | 0 | 4 | 1.40750 | 66.361 | 0.1 |
| 14 | 2 | 2 | 3 | 1.36548 | 68.683 | 2.3 |
| 15 | 1 | 1 | 4 | 1.32700 | 70.969 | 1.2 |
| 16 | 1 | 3 | 3 | 1.29161 | 73.223 | 0.9 |
| 17 | 0 | 4 | 2 | 1.25891 | 75.451 | 0.1 |
| 18 | 1 | 4 | 2 | 1.22857 | 77.657 | 0.7 |
| 19 | 2 | 3 | 3 | 1.20032 | 79.844 | 0.4 |
| 20 | 2 | 2 | 4 | 1.14922 | 84.177 | 0.5 |
| 21 | 0 | 3 | 4 | 1.12600 | 86.330 | 2.0 |
| 22 | 1 | 4 | 3 | 1.10413 | 88.478 | 3.3 |


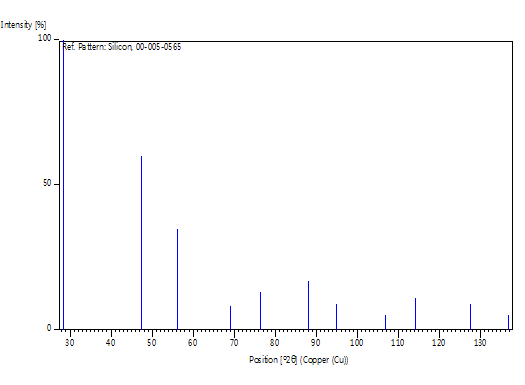


FIGURE S20. JCPDS Face-centered cubic Si crystal.

**Peak list**

No. h k l d [Å] 2Theta[deg] I [%]

1 1 1 1 3.13800 28.420 100.0

2 2 2 0 1.92000 47.306 60.0

3 3 1 1 1.63800 56.103 35.0

4 4 0 0 1.35700 69.173 8.0

5 3 3 1 1.24600 76.372 13.0

6 4 2 2 1.10830 88.059 17.0

7 5 1 1 1.04500 94.975 9.0

8 4 4 0 0.95990 106.735 5.0

9 5 3 1 0.91780 114.130 11.0

10 6 2 0 0.85860 127.574 9.0

11 5 3 3 0.82810 136.932 5.0


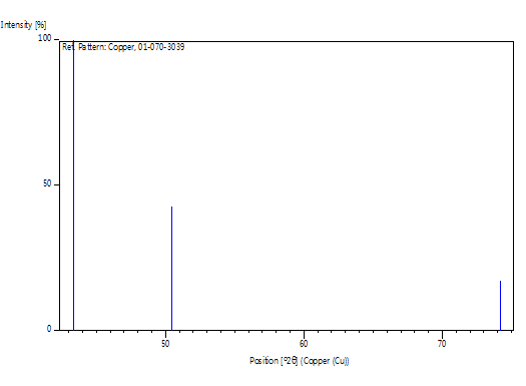


FIGURE S21. Cubic copper crystal (Reference code 01-070-3039)

**Peak list**

| No. | h | k | l | d [Å] | 2Theta[deg] | I [%] |
| --- | --- | --- | --- | --- | --- | --- |
| 1 | 1 | 1 | 1 | 2.08597 | 43.342 | 100.0 |
| 2 | 2 | 0 | 0 | 1.80650 | 50.479 | 42.7 |
| 3 | 2 | 2 | 0 | 1.27739 | 74.174 | 17.1 |


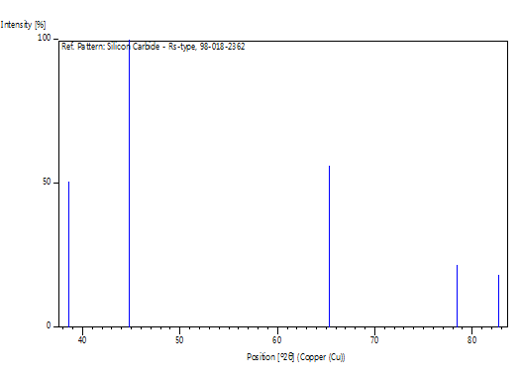


FIGURE S22. Cubic silicon carbide crystal (Reference code 98-018-2362)

**Peak list**

| No. | h | k | l | d [Å] | 2Theta[deg] | I [%] |
| --- | --- | --- | --- | --- | --- | --- |
| 1 | 1 | 1 | 1 | 2.33249 | 38.568 | 50.8 |
| 2 | 0 | 0 | 2 | 2.02000 | 44.833 | 100.0 |
| 3 | 0 | 2 | 2 | 1.42836 | 65.271 | 56.3 |
| 4 | 1 | 1 | 3 | 1.21811 | 78.451 | 21.6 |
| 5 | 2 | 2 | 2 | 1.16625 | 82.675 | 18.2 |

**Table S1.** The zeta potential values of different samples at two different diluted concentrations.

| **Sample** | **Particle size (nm)** | **Dilution Concentration (mg/mL)** | | **Measured zeta potential value (mV)** | | **Standard deviation (mV)** |
| --- | --- | --- | --- | --- | --- | --- |
| **At A*** | **At B**** |
| **A*** | **B**** |
| SiOH | ~ 50 | 0.1 | 0.05 | -21.9 | **-38.5** | 6.14 |
| PDDA@SiOH | ~ 50 | 0.1 | 0.05 | 57.5 | **57.6** | 5.41 |
| OH-GQD | < 10 | 0.5 | 0.25 | -10.3 | **-48.5** | 5.76 |
| OH-GQD@PDDA@SiOH | ~ 50 | 0.1 | 0.05 | 49.6 | **52.6** | 5.84 |
| GO | > 1 μm | 0.1 | 0.05 | -47.2 | **-52.0** | 22.4 |
| OH-GQD@PDDA@SiOH/GO | > 1 μm | 0.1 | 0.05 | 48.4 | **49.4** | 6.49 |

***A:** Recommended minimum concentration
** **B:** Half of the recommended minimum concentration

**Table S2.** Determination of IEP and optimum pH range for electrostatic assembly of PDDA@SiOH, OH-GQD and GO at half of the recommended dilution concentration according to particle size.

| **Sample** | **pH** | **Zeta potential value (mV)** |
| --- | --- | --- |
| PDDA@SiOH | 2 | 40.9 |
| 4 | 47.3 |
| 6 | 57.8 |
| **8** | **63.1** |
| 10 | 45.5 |
| 12 | 30.2 |
| OH-GQD | 2 | -9.52 |
| 4 | -39.8 |
| 6 | -30.4 |
| **8** | **-46.3** |
| 10 | -20.8 |
| 12 | -20.5 |
| GO | 2 | -41.3 |
| 4 | -49.1 |
| **6** | **-55.9** |
| 8 | -49.1 |
| 10 | -47.7 |
| 12 | 50.2 |

**Table S3**. The ID/IG values of the samples calculated by the ratio of the D band peak area to the G band peak area using Gaussian-Lorentzian curve fitting model.

| **Sample** | **D band** | | | **G band** | | | **ID/IG** |
| --- | --- | --- | --- | --- | --- | --- | --- |
| **A** | **I** | **FWHM** | **A** | **I** | **FWHM** |
| GO | 18336.945 | 1347.024 | 110.981 | 101.122.185 | 1597.777 | 71.543 | 0.84 |
| rGO | 13540.899 | 1354.743 | 139.044 | 6144.109 | 1589.024 | 79.303 | 0.85 |
| OH-GQD | 32378.638 | 1354.041 | 257.981 | 10764.481 | 1579.407 | 114.160 | 0.86 |
| 0.2OH-GQD@Si/0.2-GO-1 | 45055.560 | 1361.252 | 170.448 | 18150.720 | 1588.885 | 72.874 | 0.86 |
| 0.2OH-GQD@Si/0.2-rGO-1 | 88963.744 | 1348.554 | 164.776 | 29006.088 | 1588.941 | 71.616 | 0.85 |
| 0.3OH-GQD@Si/0.1-GO-2 | 6364.235 | 1355.164 | 100.754 | 22191.713 | 1573.163 | 100.754 | 0.86 |
| 0.3OH-GQD@Si/0.1rGO-2 | 100482.656 | 1347.052 | 199.492 | 61933.931 | 1582.734 | 88.147 | 0.85 |
